# Supplementary material for: Construction of a photoanode with varied TiO2nanostructures for a Z907-sensitized solar cell with efficiency exceeding 10%
Source: Royal Society of Chemistry journal article supplement (doi:10.1039/c4ta00645c), 2014-01-01
Supplement: c4ta00645c1.pdf [file c4ta00645c1.pdf]

# Electronic Supplementary Information

## **Construction of a photoanode with varied TiO<sub>2</sub> nanostructures for a Z907-sensitized solar cell with efficiency exceeding 10 %**

Jia-Wei Shiu, Zih-Jian Lan, Chien-Yi Chan, Hui-Ping Wu and Eric Wei-Guang Diau\*

*Department of Applied Chemistry and Institute of Molecular Science, National Chiao*

*Tung University, No.1001, Ta Hsueh Rd., Hsinchu 30010, Taiwan.*

*e-mail: [diaw@mail.nctu.edu.tw](mailto:diaw@mail.nctu.edu.tw)*

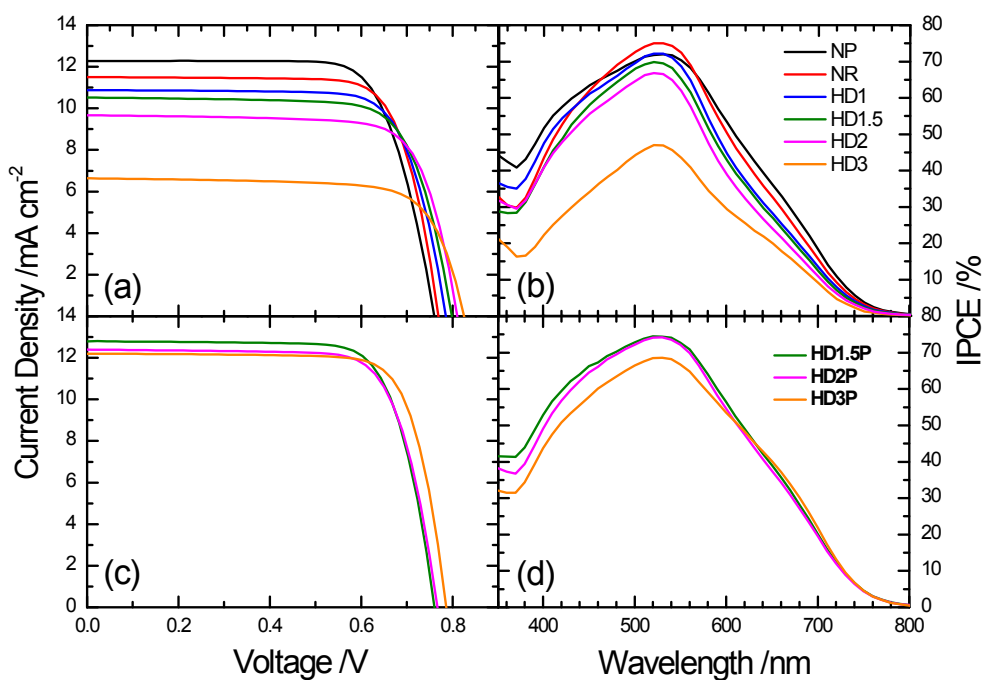

**Figure S1.** Photovoltaic characteristic plots of (a)  $JV$  curves and (b) IPCE action spectra of Z907 devices with titania photoanodes made of NP, NR, HD1, HD1.5, HD2 and HD3 at film thickness  $\sim 10$   $\mu\text{m}$ . The corresponding  $JV$  and IPCE plots for devices made of blended HD1.5P, HD2P and HD3P are shown in (c) and (d), respectively.

**Table S1.** Dye-loading (DL) and photovoltaic parameters of Z907 devices with photoanodes made of varied  $\text{TiO}_2$  nanostructures at the same film thickness ( $L \sim 10$   $\mu\text{m}$ ) under simulated AM-1.5G illumination (power density  $100 \text{ mW cm}^{-2}$ ) and active area  $0.16 \text{ cm}^2$  with a black mask of area  $0.2025 \text{ cm}^2$ .

| $\text{TiO}_2$ | $L$<br>/ $\mu\text{m}$ | DL<br>/ $\text{nmol cm}^{-2}$ | $J_{\text{sc}}$<br>/ $\text{mA cm}^{-2}$ | $V_{\text{oc}}$<br>/ $\text{mV}$ | FF    | $\eta$<br>/% |
|----------------|------------------------|-------------------------------|------------------------------------------|----------------------------------|-------|--------------|
| NP             | 10                     | 121                           | 12.28                                    | 763                              | 0.739 | 6.92         |
| NR             | 11                     | 87                            | 11.50                                    | 773                              | 0.758 | 6.74         |
| HD1            | 10                     | 72                            | 10.87                                    | 789                              | 0.750 | 6.43         |
| HD1.5          | 11                     | 60                            | 10.52                                    | 803                              | 0.740 | 6.25         |
| HD2            | 10                     | 53                            | 9.66                                     | 815                              | 0.749 | 5.90         |
| HD3            | 10                     | 33                            | 6.64                                     | 823                              | 0.733 | 4.04         |
| HD1.5P         | 10                     | 93                            | 12.80                                    | 764                              | 0.746 | 7.30         |
| HD2P           | 10                     | 86                            | 12.42                                    | 770                              | 0.744 | 7.11         |
| HD3P           | 10                     | 78                            | 11.94                                    | 784                              | 0.750 | 7.02         |

**Table S2.** Photovoltaic parameters of devices made of Z907 dye and multi-layer (ML) TiO<sub>2</sub> films with varied film configurations defined as A-D under simulated AM-1.5G illumination (power density 100 mW cm<sup>-2</sup>) and active area 0.16 cm<sup>2</sup> with a black mask of area 0.2025 cm<sup>2</sup>.<sup>a</sup>

| Device | TiO <sub>2</sub> film configuration | Working electrode | $J_{SC}$<br>/mA cm <sup>-2</sup> | $V_{OC}$<br>/mV | FF          | $\eta$<br>/% |
|--------|-------------------------------------|-------------------|----------------------------------|-----------------|-------------|--------------|
| A      | 2/3/3 <sup>b</sup>                  | <i>a</i>          | 18.00                            | 746             | 0.722       | 9.70         |
|        |                                     | <i>b</i>          | 17.84                            | 750             | 0.722       | 9.67         |
|        |                                     | <i>c</i>          | 18.11                            | 749             | 0.711       | 9.64         |
|        |                                     | average           | 17.98±0.11                       | 748±2           | 0.718±0.005 | 9.67±0.02    |
| B      | 2/3/3 <sup>c</sup>                  | <i>a</i>          | 17.64                            | 753             | 0.726       | 9.64         |
|        |                                     | <i>b</i>          | 17.53                            | 756             | 0.720       | 9.54         |
|        |                                     | <i>c</i>          | 17.55                            | 752             | 0.720       | 9.51         |
|        |                                     | average           | 17.57±0.05                       | 754±2           | 0.722±0.003 | 9.56±0.06    |
| C      | 2/2/1/3 <sup>d</sup>                | <i>a</i>          | 17.46                            | 755             | 0.722       | 9.52         |
|        |                                     | <i>b</i>          | 17.37                            | 756             | 0.724       | 9.51         |
|        |                                     | <i>c</i>          | 17.45                            | 756             | 0.720       | 9.51         |
|        |                                     | average           | 17.43±0.04                       | 756±0           | 0.722±0.002 | 9.51±0.00    |
| D      | 2/3/3 <sup>e</sup>                  | <i>a</i>          | 17.14                            | 765             | 0.731       | 9.59         |
|        |                                     | <i>b</i>          | 16.91                            | 765             | 0.737       | 9.54         |
|        |                                     | <i>c</i>          | 16.98                            | 765             | 0.736       | 9.54         |
|        |                                     | average           | 17.01±0.10                       | 765±0           | 0.735±0.003 | 9.56±0.02    |

<sup>a</sup> All TiO<sub>2</sub> working electrodes (labeled as *a-c*) were fabricated under the same experimental conditions; the uncertainties represent one standard deviation. <sup>b</sup> The TiO<sub>2</sub> film has ML configuration NP/NR/SL. <sup>c</sup> The TiO<sub>2</sub> film has ML configuration NP/HD1/SL. <sup>d</sup> The TiO<sub>2</sub> film has ML configuration NP/HD1/HD1.5/SL. <sup>e</sup> The TiO<sub>2</sub> film has ML configuration NP/HD1.5/SL.

**Table S3.** Photovoltaic parameters of devices made of Z907 dye and multi-layer (ML) TiO<sub>2</sub> films with varied film configurations defined as E-H under simulated AM-1.5G illumination (power density 100 mW cm<sup>-2</sup>) and active area 0.16 cm<sup>2</sup> with a black mask of area 0.2025 cm<sup>2</sup>.<sup>a</sup>

| Device | TiO <sub>2</sub> film configuration <sup>b</sup> | Working electrodes | $J_{SC}$<br>/mA cm <sup>-2</sup> | $V_{OC}$<br>/mV | FF          | $\eta$<br>/% |
|--------|--------------------------------------------------|--------------------|----------------------------------|-----------------|-------------|--------------|
| E      | 2/1/1/3                                          | <i>a</i>           | 17.09                            | 758             | 0.751       | 9.74         |
|        |                                                  | <i>b</i>           | 17.36                            | 758             | 0.738       | 9.71         |
|        |                                                  | <i>c</i>           | 17.26                            | 759             | 0.739       | 9.69         |
|        |                                                  | average            | 17.24±0.11                       | 758±0           | 0.743±0.006 | 9.71±0.02    |
| F      | 2/1/2/3                                          | <i>a</i>           | 17.88                            | 750             | 0.736       | 9.87         |
|        |                                                  | <i>b</i>           | 17.63                            | 755             | 0.740       | 9.85         |
|        |                                                  | <i>c</i>           | 18.02                            | 751             | 0.721       | 9.76         |
|        |                                                  | average            | 17.84±0.16                       | 752±2           | 0.732±0.008 | 9.82±0.05    |
| G      | 2/1/3/3                                          | <i>a</i>           | 18.30                            | 748             | 0.728       | 9.97         |
|        |                                                  | <i>b</i>           | 18.22                            | 749             | 0.724       | 9.88         |
|        |                                                  | <i>c</i>           | 18.00                            | 749             | 0.730       | 9.83         |
|        |                                                  | average            | 18.17±0.13                       | 749±0           | 0.727±0.002 | 9.89±0.06    |
| H      | 2/1/4/3                                          | <i>a</i>           | 17.44                            | 744             | 0.743       | 9.72         |
|        |                                                  | <i>b</i>           | 17.55                            | 744             | 0.738       | 9.64         |
|        |                                                  | <i>c</i>           | 17.35                            | 742             | 0.747       | 9.61         |
|        |                                                  | average            | 17.45±0.08                       | 743±1           | 0.743±0.004 | 9.66±0.05    |

<sup>a</sup> All TiO<sub>2</sub> working electrodes (labeled as *a-c*) were fabricated under the same experimental conditions; the uncertainties represent one standard deviation. <sup>b</sup> The TiO<sub>2</sub> films have ML configuration NP/HD1.5P/HD2P/SL with varied number of layers of HD2P.

**Table S4.** Photovoltaic parameters of devices made of Z907 dye and TiO<sub>2</sub> films with the HD1/SL bi-layer (BL) configuration defined as I-M under simulated AM-1.5G illumination (power density 100 mW cm<sup>-2</sup>) and active area 0.16 cm<sup>2</sup> with a black mask of area 0.2025 cm<sup>2</sup>.<sup>a</sup>

| Device | TiO <sub>2</sub> film configuration <sup>b</sup> | Working electrode | $J_{SC}$<br>/mA cm <sup>-2</sup> | $V_{OC}$<br>/mV | FF          | $\eta$<br>/% |
|--------|--------------------------------------------------|-------------------|----------------------------------|-----------------|-------------|--------------|
| I      | 3/3                                              | <i>a</i>          | 16.69                            | 778             | 0.747       | 9.71         |
|        |                                                  | <i>b</i>          | 16.58                            | 778             | 0.748       | 9.64         |
|        |                                                  | <i>c</i>          | 16.52                            | 782             | 0.746       | 9.64         |
|        |                                                  | average           | 16.60±0.07                       | 779±2           | 0.747±0.001 | 9.66±0.03    |
| J      | 4/3                                              | <i>a</i>          | 17.10                            | 775             | 0.741       | 9.82         |
|        |                                                  | <i>b</i>          | 16.79                            | 776             | 0.747       | 9.73         |
|        |                                                  | <i>c</i>          | 17.08                            | 774             | 0.736       | 9.72         |
|        |                                                  | average           | 16.99±0.14                       | 775±1           | 0.741±0.004 | 9.76±0.04    |
| K      | 5/3                                              | <i>a</i>          | 17.49                            | 770             | 0.733       | 9.87         |
|        |                                                  | <i>b</i>          | 17.35                            | 766             | 0.739       | 9.83         |
|        |                                                  | <i>c</i>          | 17.24                            | 767             | 0.740       | 9.79         |
|        |                                                  | average           | 17.36±0.10                       | 768±2           | 0.737±0.003 | 9.83±0.03    |
| L      | 6/3                                              | <i>a</i>          | 17.66                            | 760             | 0.740       | 9.94         |
|        |                                                  | <i>b</i>          | 17.76                            | 763             | 0.734       | 9.92         |
|        |                                                  | <i>c</i>          | 17.83                            | 757             | 0.735       | 9.91         |
|        |                                                  | average           | 17.75±0.07                       | 760±2           | 0.736±0.003 | 9.92±0.01    |
| M      | 7/3                                              | <i>a</i>          | 17.73                            | 756             | 0.738       | 9.89         |
|        |                                                  | <i>b</i>          | 17.59                            | 758             | 0.740       | 9.87         |
|        |                                                  | <i>c</i>          | 17.37                            | 756             | 0.751       | 9.86         |
|        |                                                  | average           | 17.56±0.15                       | 757±1           | 0.743±0.006 | 9.87±0.01    |

<sup>a</sup> All TiO<sub>2</sub> working electrodes (labeled as *a-c*) were fabricated under the same experimental conditions; the uncertainties represent one standard deviation. <sup>b</sup> The TiO<sub>2</sub> films have BL configuration HD1/SL with varied number of layers of HD1.

**Table S5.** Photovoltaic parameters of 20 Z907 devices fabricated according to the HDP-ML film configuration of device G under simulated AM-1.5G illumination (power density  $100 \text{ mW cm}^{-2}$ ) and active area  $0.16 \text{ cm}^2$  with a black mask of area  $0.2025 \text{ cm}^2$ .<sup>a</sup>

| Working electrode | $J_{SC}$<br>/ $\text{mA cm}^{-2}$ | $V_{OC}$<br>/ $\text{mV}$ | FF                | $\eta$<br>/ $\%$ | $\eta_s^b$<br>/ $\%$ | Counts     |
|-------------------|-----------------------------------|---------------------------|-------------------|------------------|----------------------|------------|
| 1                 | 17.46                             | 759                       | 0.743             | 9.85             | 9.85                 | 1          |
| 2                 | 17.55                             | 761                       | 0.743             | 9.92             | 9.90                 | 1          |
| 3                 | 17.44                             | 756                       | 0.753             | 9.93             | 9.95                 | 3          |
| 4                 | 17.90                             | 752                       | 0.741             | 9.97             | 9.95                 |            |
| 5                 | 18.30                             | 748                       | 0.728             | 9.97             | 9.95                 |            |
| 6                 | 17.79                             | 751                       | 0.747             | 9.98             | 10.00                | 8          |
| 7                 | 17.66                             | 753                       | 0.751             | 9.99             | 10.00                |            |
| 8                 | 17.39                             | 758                       | 0.758             | 9.99             | 10.00                |            |
| 9                 | 17.45                             | 761                       | 0.752             | 9.99             | 10.00                |            |
| 10                | 17.41                             | 758                       | 0.757             | 9.99             | 10.00                |            |
| 11                | 18.29                             | 757                       | 0.723             | 10.01            | 10.00                |            |
| 12                | 17.55                             | 762                       | 0.749             | 10.02            | 10.00                |            |
| 13                | 17.99                             | 750                       | 0.743             | 10.02            | 10.00                |            |
| 14                | 18.21                             | 758                       | 0.727             | 10.03            | 10.05                | 5          |
| 15                | 18.32                             | 757                       | 0.724             | 10.04            | 10.05                |            |
| 16                | 17.66                             | 756                       | 0.752             | 10.04            | 10.05                |            |
| 17                | 18.21                             | 753                       | 0.733             | 10.05            | 10.05                |            |
| 18                | 18.30                             | 750                       | 0.734             | 10.07            | 10.05                |            |
| 19                | 18.32                             | 755                       | 0.729             | 10.08            | 10.10                | 1          |
| 20                | 18.63                             | 752                       | 0.723             | 10.13            | 10.15                | 1          |
| average           | $17.89 \pm 0.39$                  | $755 \pm 4$               | $0.741 \pm 0.012$ | $10.00 \pm 0.06$ | $10.01 \pm 0.07$     | Total = 20 |

<sup>a</sup> All  $\text{TiO}_2$  working electrodes (labeled as 1-20) were fabricated under the same experimental conditions; the uncertainties represent one standard deviation. <sup>b</sup> The efficiencies were rounded up or down in a step 0.05 % to make the distribution plot shown in Figure 7a.

**Table S6.** Photovoltaic parameters of 20 Z907 devices fabricated according to the HD1-BL film configuration of device L under simulated AM-1.5G illumination (power density  $100 \text{ mW cm}^{-2}$ ) and active area  $0.16 \text{ cm}^2$  with a black mask of area  $0.2025 \text{ cm}^2$ .<sup>a</sup>

| Working electrode | $J_{sc}$<br>/ $\text{mA cm}^{-2}$ | $V_{oc}$<br>/ $\text{mV}$ | FF                | $\eta$<br>/%     | $\eta_s^b$<br>/% | Counts     |
|-------------------|-----------------------------------|---------------------------|-------------------|------------------|------------------|------------|
| 1                 | 17.67                             | 765                       | 0.730             | 9.87             | 9.85             | 1          |
| 2                 | 17.70                             | 763                       | 0.734             | 9.91             | 9.90             | 1          |
| 3                 | 17.52                             | 769                       | 0.738             | 9.94             | 9.95             | 3          |
| 4                 | 17.54                             | 762                       | 0.746             | 9.97             | 9.95             |            |
| 5                 | 17.20                             | 771                       | 0.752             | 9.97             | 9.95             |            |
| 6                 | 17.46                             | 765                       | 0.748             | 9.99             | 10.00            | 5          |
| 7                 | 17.54                             | 763                       | 0.747             | 10.00            | 10.00            |            |
| 8                 | 17.75                             | 758                       | 0.743             | 10.00            | 10.00            |            |
| 9                 | 17.58                             | 769                       | 0.740             | 10.00            | 10.00            |            |
| 10                | 17.61                             | 764                       | 0.745             | 10.02            | 10.00            |            |
| 11                | 17.79                             | 763                       | 0.739             | 10.03            | 10.05            | 5          |
| 12                | 17.66                             | 759                       | 0.749             | 10.04            | 10.05            |            |
| 13                | 17.57                             | 762                       | 0.751             | 10.05            | 10.05            |            |
| 14                | 17.71                             | 762                       | 0.746             | 10.07            | 10.05            |            |
| 15                | 17.97                             | 759                       | 0.738             | 10.07            | 10.05            |            |
| 16                | 17.59                             | 761                       | 0.753             | 10.08            | 10.10            | 3          |
| 17                | 17.71                             | 762                       | 0.748             | 10.09            | 10.10            |            |
| 18                | 17.72                             | 765                       | 0.745             | 10.10            | 10.10            |            |
| 19                | 17.77                             | 763                       | 0.750             | 10.17            | 10.15            | 1          |
| 20                | 17.88                             | 758                       | 0.753             | 10.21            | 10.20            | 1          |
| average           | $17.65 \pm 0.16$                  | $763 \pm 3$               | $0.745 \pm 0.006$ | $10.03 \pm 0.08$ | $10.03 \pm 0.08$ | Total = 20 |

<sup>a</sup> All  $\text{TiO}_2$  working electrodes (labeled as 1-20) were fabricated under the same experimental conditions; the uncertainties represent one standard deviation. <sup>b</sup> The efficiencies were rounded up or down in a step 0.05 % to make the distribution plot shown in Figure 7b.
